# Supplementary material for: A Robust Method for Perfusable Microvascular Network Formation In Vitro
Source: PubMed Central journal article supplement — Small Methods. Author manuscript; Available in PMC 2023 Jan 17. (PMC9844969; doi:10.1002/smtd.202200143), 2022-04-03
Supplement: NIHMS1862800-supplement-Supporting_Information.pdf [file NIHMS1862800-supplement-Supporting_Information.pdf]

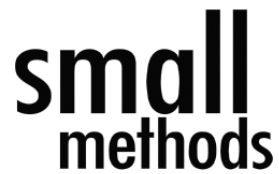

## Supporting Information

for *Small Methods*, DOI: 10.1002/smtd.202200143

### A Robust Method for Perfusable Microvascular Network Formation In Vitro

*Zhengpeng Wan, Amy X. Zhong, Shun Zhang, Georgios Pavlou, Mark F. Coughlin, Sarah E. Shelton, Huu Tuan Nguyen, Jochen H. Lorch, David A. Barbie, and Roger D. Kamm\**

## Supporting Information

**A robust method for perfusable microvascular network formation in vitro**

Zhengpeng Wan, Amy X. Zhong, Shun Zhang, Georgios Pavlou, Mark F. Coughlin, Sarah E. Shelton, Huu Tuan Nguyen, Jochen H. Lorch, David A. Barbie, Roger D. Kamm \*

**Figure S1**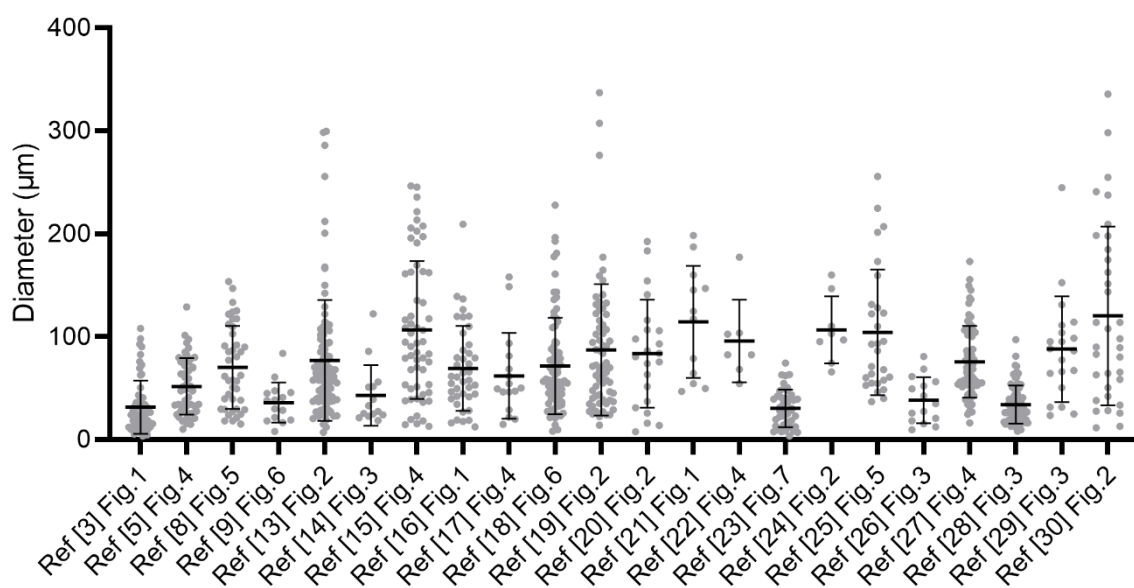

**Figure S1.** Vessel diameter of perfusable MVNs from published studies. Published 2D MVN figures were used for vessel diameter analysis. Diameters were converted and calculated using scale bar information in the published figures. Method for vessel diameter measurement is provided in Methods section and Figure S4.

Figure S2

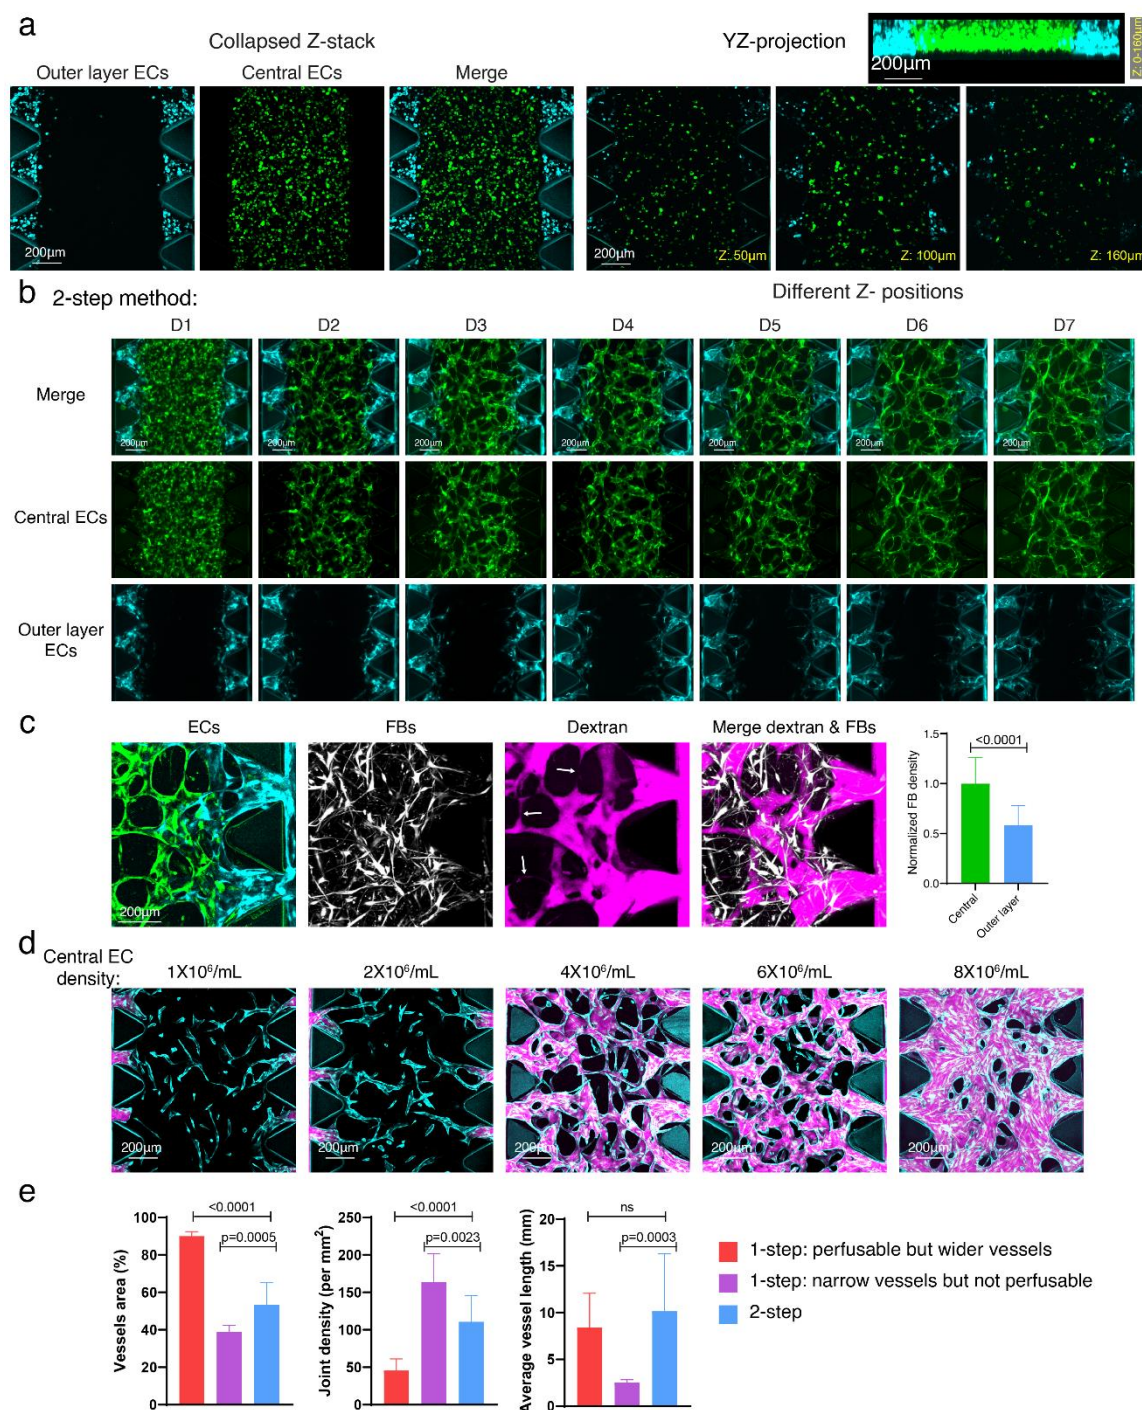

**Figure S2.** Features of 2-step seeding method produced MVNs. a) Representative images of central and outer layer EC distribution at day 0. Central ECs are uniformly distributed, while outer layer cells are slightly denser at the bottom. Collapsed Z-stack (left), YZ-projection (top right) and different Z-positions (bottom right) are shown. Cyan, ImHUVeCs expressing BFP. Green, ImHUVeCs expressing GFP. b) Representative epifluorescent images showing the 2-step MVN formation process from day 1 to day 7 (outer layer: ImHUVeCs expressing BFP; central: ImHUVeCs expressing GFP with lung FBs). c) Representative images of FB

locations (left) and statistical analysis of normalized FB density (right) in the microfluidic device seeded with 2-step method. Immortalized lung FBs expressing mCherry were used. White arrows point to the perfusable narrow microvessels. Fewer FBs are located at the regions between microposts compared to the central region. Cyan, ImHUVeCs expressing BFP. Green, ImHUVeCs expressing GFP. Magenta, dextran (70 kDa). Bars represent mean  $\pm$  S.D. Two-tailed  $t$  tests were performed for the statistical comparisons ( $n = 2$  devices, 12 ROIs each). d) Confocal images of MVNs made with 2-step seeding method using different density of central ECs. Lung FBs in the central region are  $1.5 \times 10^6/\text{mL}$  for all the groups. Lower density ( $4\text{-}6 \times 10^6/\text{mL}$ ) ECs tend to form perfusable narrow MVNs, while too few ECs lead to nonconnected microvessels, although the vessels made of outer layer ECs have open lumens. Cyan, ImHUVeCs expressing BFP. Magenta, dextran (70 kDa). e) Statistical analysis of vessel area percentage (left), joint density (middle), and average vessel length (right) of central MVNs made with 1-step or 2-step seeding method. Bars represent mean  $\pm$  S.D. Two-tailed  $t$  tests were performed for the statistical comparisons ( $n = 3$  devices, 5 ROIs each).

**Figure S3**

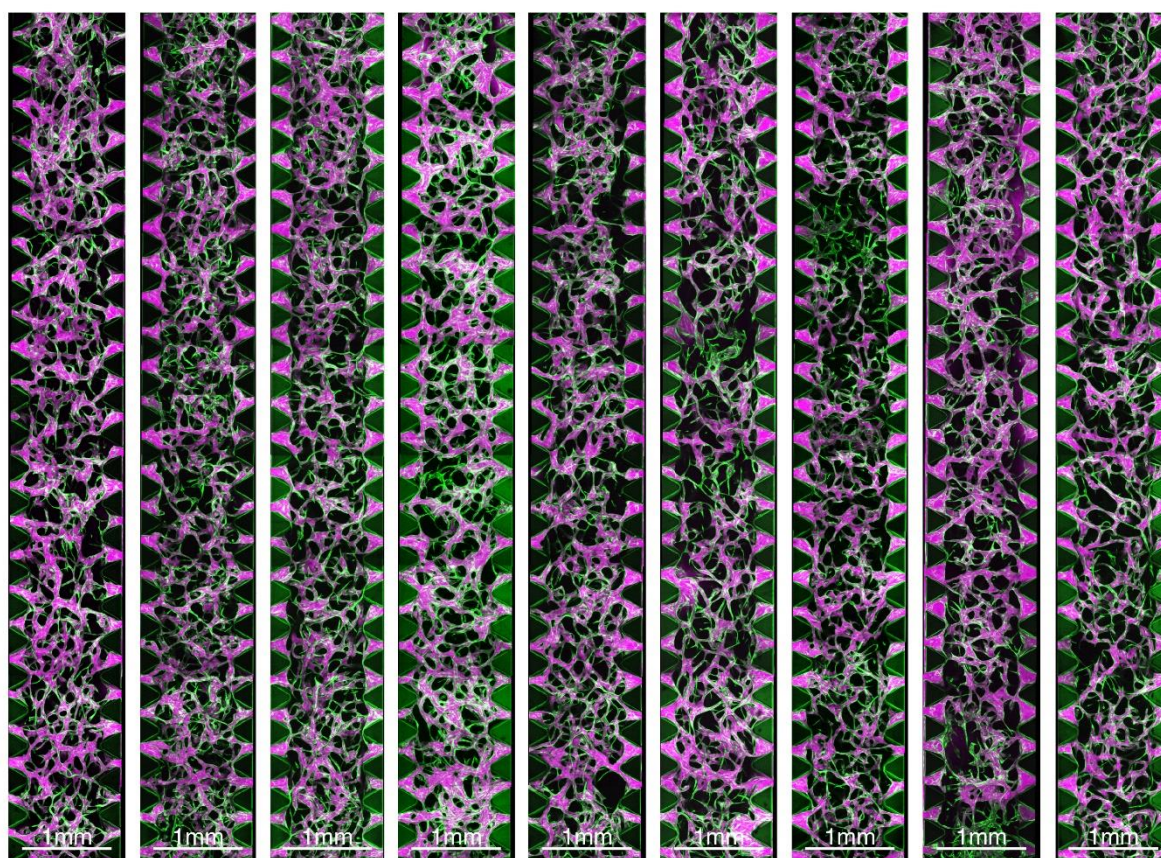

**Figure S3.** Representative images of 2-step MVNs in the entire device. Nine devices were seeded with ImHUVeCs expressing BFP and lung FBs using 2-step seeding methods, which

indicates a high reproducibility. Opening % is  $99.78 \pm 0.67\%$ ; central perfusable MVN % is  $98.14 \pm 3.86\%$  (n = 9 devices). Green, ImHUVeCs. Magenta, dextran (70 kDa).

**Figure S4**

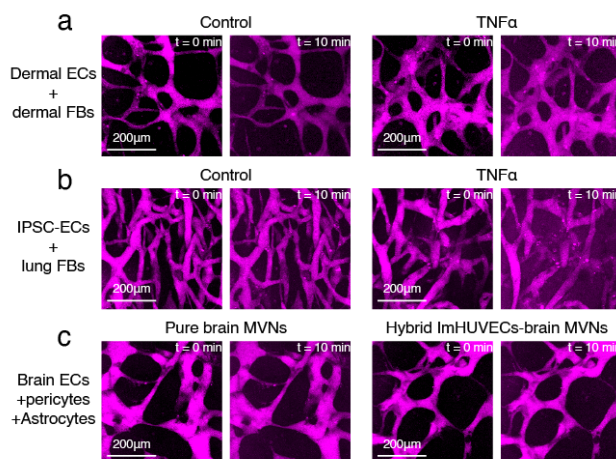

**Figure S4.** Representative images of permeability tests in 2-step MVNs. a) Representative images of 70 kDa dextran in 2-step dermal MVNs treated with or without TNF $\alpha$ . b) 2-step MVNs formed with iPSC-ECs and lung FBs were treated with or without TNF $\alpha$ . 70 kDa dextran (magenta) was used for permeability analysis. c) Representative images of 10 kDa dextran perfused in pure brain MVNs made with 2-step strategy, or in hybrid brain MVNs (outer layer ECs: ImHUVeCs; central: brain ECs+brain pericytes+astrocytes) over 10 min.

**Figure S5**

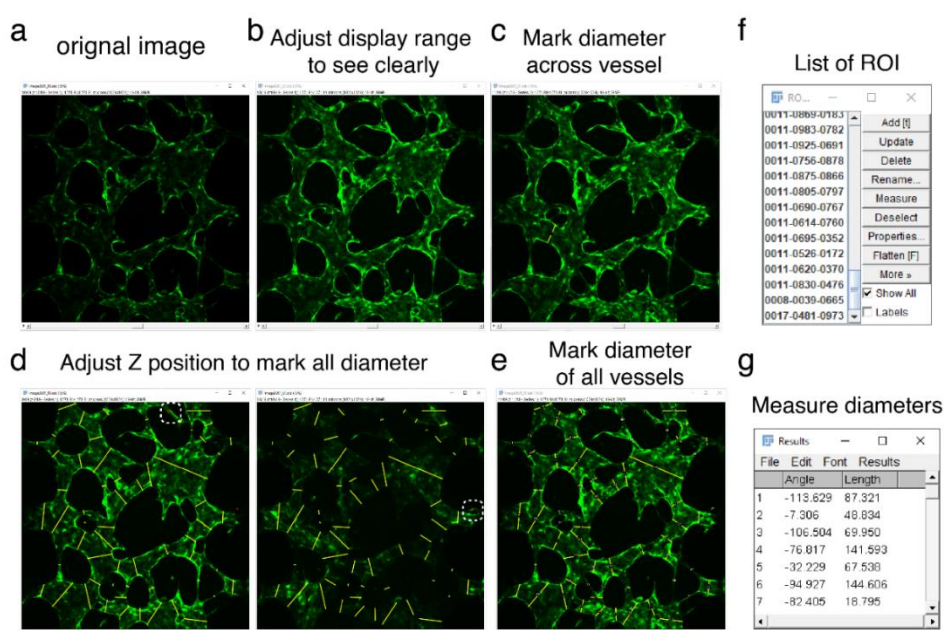

**Figure S5.** Vessel diameter analysis. a) Load an image in ImageJ. b) adjust display range of the image using brightness/contract function. c) Mark diameter of a lumen using straight ROI tool and add it to ROI manager. Yellow line shows a ROI. Similarly mark other vessel lumens on the same slice. d) adjust Z positions of the slices, and mark other vessel lumens at different Z positions. Red lines in the white dashed squares highlight 2 vessels at different Z positions. e) Mark all the vessel lumens. After labeling all the vessel lumen, f) click the measure button on ROI manager window. g) The results of the vessel diameter would be shown in results window.

**Table S1:** Experimental parameters in each figure.

| Figure title.                    | 1- or 2-step    | ECs                                             | Outer layer ECs                                                | Central ECs                                                   | Stromal cells                                                                 | Matrix info                                         | Time window |
|----------------------------------|-----------------|-------------------------------------------------|----------------------------------------------------------------|---------------------------------------------------------------|-------------------------------------------------------------------------------|-----------------------------------------------------|-------------|
| Figure 1 (b-d)                   | 1-step          | ImHUVECs expressing BFP (various concentration) |                                                                |                                                               | Lung FBs (various concentration)                                              | Bovine Fibrin 3 mg/mL                               | Day 7       |
| Figure 2                         | 1-step          | ImHUVECs expressing GFP ( $7 \times 10^6$ /mL)  |                                                                |                                                               | Lung FBs ( $1 \times 10^6$ /mL)                                               | Bovine Fibrin 3 mg/mL                               | Day 7       |
| Figure 3                         | 1-step          | ImHUVECs expressing BFP (various concentration) |                                                                |                                                               | Lung FBs (various concentration)                                              | Bovine Fibrin 3 mg/mL                               | Day 7       |
| Figure 4b                        | 1-step wider    | ImHUVECs expressing BFP ( $8 \times 10^6$ /mL)  |                                                                |                                                               | Lung FBs ( $1 \times 10^6$ /mL)                                               | Bovine Fibrin 3 mg/mL                               | Day 7       |
| Figure 4b                        | 1-step narrower | ImHUVECs expressing BFP ( $5 \times 10^6$ /mL)  |                                                                |                                                               | Lung FBs ( $1.5 \times 10^6$ /mL)                                             | Bovine Fibrin 3 mg/mL                               | Day 7       |
| Figure 4c                        | 2-step          |                                                 | ImHUVECs expressing BFP ( $10 \times 10^6$ /mL)                | ImHUVECs expressing GFP ( $5 \times 10^6$ /mL)                | Lung FBs ( $1.5 \times 10^6$ /mL)                                             | Bovine Fibrin 3 mg/mL                               | Day 7       |
| Figure 5a                        | 2-step          |                                                 | ImHUVECs expressing BFP ( $10 \times 10^6$ /mL)                | ImHUVECs expressing GFP ( $5 \times 10^6$ /mL)                | Lung FBs ( $1.5 \times 10^6$ /mL)                                             | Bovine Fibrin 3 mg/mL                               | Day 7       |
| Figure 5b top                    | 1-step          | ImHUVECs expressing BFP ( $8 \times 10^6$ /mL)  |                                                                |                                                               | Lung FBs ( $1 \times 10^6$ /mL)                                               | Bovine Fibrin 3 mg/mL                               | Day 7       |
| Figure 5b bottom<br>Figure 5 d-e | 2-step          |                                                 | ImHUVECs expressing BFP ( $10 \times 10^6$ /mL)                | ImHUVECs expressing GFP ( $5 \times 10^6$ /mL)                | Lung FBs ( $1.5 \times 10^6$ /mL)                                             | Bovine Fibrin 3 mg/mL                               | Day 7       |
| Figure 6a                        | 2-step          |                                                 | ImHUVECs expressing BFP ( $10 \times 10^6$ /mL)                | ImHUVECs expressing GFP ( $5 \times 10^6$ /mL)                | Patient-derived thyroid FBs ( $1.5 \times 10^6$ /mL)                          | Bovine Fibrin 3 mg/mL                               | Day 7       |
| Figure 6b                        | 2-step          |                                                 | Brain microvascular ECs expressing GFP ( $12 \times 10^6$ /mL) | Brain microvascular ECs expressing GFP ( $6 \times 10^6$ /mL) | Brain pericytes ( $1 \times 10^6$ /mL)<br>Astrocytes ( $0.5 \times 10^6$ /mL) | Bovine Fibrin 3 mg/mL                               | Day 7       |
| Figure 6 c                       | 2-step          |                                                 | HDBMEC expressing BFP ( $12 \times 10^6$ /mL)                  | HDBMEC expressing BFP ( $6 \times 10^6$ /mL)                  | Dermal FBs ( $1.5 \times 10^6$ /mL)                                           | Bovine Fibrin 3 mg/mL                               | Day 7       |
| Figure 6 e                       | 2-step          |                                                 | HDBMEC expressing BFP ( $10 \times 10^6$ /mL)                  | HDBMEC expressing BFP ( $5 \times 10^6$ /mL)                  | Dermal FBs ( $1.5 \times 10^6$ /mL)                                           | Bovine Fibrin 3 mg/mL                               | Day 7       |
| Figure 6 f-h                     | 2-step          |                                                 | iPSC-ECs ( $10 \times 10^6$ /mL)                               | iPSC-ECs ( $5 \times 10^6$ /mL)                               | Lung FBs ( $1.5 \times 10^6$ /mL)                                             | Bovine Fibrin 3 mg/mL                               | Day 7       |
| Figure 7b                        | 2-step          |                                                 | ImHUVECs expressing BFP ( $10 \times 10^6$ /mL)                | Brain microvascular ECs expressing GFP ( $6 \times 10^6$ /mL) | Brain pericytes ( $1 \times 10^6$ /mL)<br>Astrocytes ( $0.5 \times 10^6$ /mL) | Bovine Fibrin 3 mg/mL                               | Day 7       |
| Figure 7d                        | 2-step          |                                                 | ImHUVECs expressing BFP ( $10 \times 10^6$ /mL)                | iPSC-ECs ( $5 \times 10^6$ /mL)                               | Lung FBs ( $1.5 \times 10^6$ /mL)                                             | Bovine Fibrin 3 mg/mL                               | Day 7       |
| Figure 8b (left)                 | 1-step          | ImHUVECs expressing GFP ( $8 \times 10^6$ /mL)  |                                                                |                                                               | Lung FBs ( $1 \times 10^6$ /mL)                                               | Bovine Fibrin 3 mg/mL                               | Day 7       |
| Figure 8b (right)                | 1-step          | ImHUVECs expressing GFP ( $8 \times 10^6$ /mL)  |                                                                |                                                               | Lung FBs ( $1 \times 10^6$ /mL)                                               | Bovine Fibrin 5 mg/mL                               | Day 7       |
| Figure 8c                        | 2-step          |                                                 | ImHUVECs expressing GFP ( $10 \times 10^6$ /mL)                | ImHUVECs expressing GFP ( $5 \times 10^6$ /mL)                | Lung FBs ( $1.5 \times 10^6$ /mL)                                             | Bovine Fibrin Central:5 mg/mL; outer layer: 3 mg/mL | Day 7       |

|                  |        |                                                  |                                                                  |                                                                 |                                                                                   |                                                                                                                             |                 |
|------------------|--------|--------------------------------------------------|------------------------------------------------------------------|-----------------------------------------------------------------|-----------------------------------------------------------------------------------|-----------------------------------------------------------------------------------------------------------------------------|-----------------|
| Figure 8e        | 1-step | ImHUVECs expressing GFP (8 x10 <sup>6</sup> /mL) |                                                                  |                                                                 | Lung FBs (1 x10 <sup>6</sup> /mL)                                                 | Bovine Fibrin 5 mg/mL                                                                                                       | Day 7           |
| Figure 8b        | 1-step | ImHUVECs expressing GFP (8 x10 <sup>6</sup> /mL) |                                                                  |                                                                 | Lung FBs (1 x10 <sup>6</sup> /mL)                                                 | 90% 6 mg/mL human fibrin mixed with 10% 1.5 mg/mL Alexa488 human fibrin                                                     | Day 7           |
| Figure 8f        | 2-step |                                                  | ImHUVECs expressing GFP (10 x10 <sup>6</sup> /mL)                | ImHUVECs expressing GFP (5 x10 <sup>6</sup> /mL)                | Lung FBs (1.5 x10 <sup>6</sup> /mL)                                               | Outer layer: Bovine Fibrin 5 mg/mL;<br><br>Central: 90% 6 mg/mL human fibrin mixed with 10% 1.5 mg/mL Alexa488 human fibrin | Day 7           |
| Figure S2 a-b    | 2-step |                                                  | ImHUVECs expressing BFP (10 x10 <sup>6</sup> /mL)                | ImHUVECs expressing GFP (5 x10 <sup>6</sup> /mL)                | Lung FBs (1.5 x10 <sup>6</sup> /mL)                                               | Bovine Fibrin 3 mg/mL                                                                                                       | Day 0 to Day 7. |
| Figure S2 c      | 2-step |                                                  | ImHUVECs expressing BFP (10 x10 <sup>6</sup> /mL)                | ImHUVECs expressing GFP (5 x10 <sup>6</sup> /mL)                | Immortalized lung FBs expressing mCherry (1.5 x10 <sup>6</sup> /mL)               | Bovine Fibrin 3 mg/mL                                                                                                       | Day 7           |
| Figure S2 d      | 2-step |                                                  | ImHUVECs expressing BFP (10 x10 <sup>6</sup> /mL)                | ImHUVECs expressing GFP (various concentration)                 | Lung FBs (1.5 x10 <sup>6</sup> /mL)                                               | Bovine Fibrin 3 mg/mL                                                                                                       | Day 7           |
| Figure S3        | 2-step |                                                  | ImHUVECs expressing BFP (10 x10 <sup>6</sup> /mL)                | ImHUVECs expressing BFP (5 x10 <sup>6</sup> /mL)                | Lung FBs (1.5 x10 <sup>6</sup> /mL)                                               | Bovine Fibrin 3 mg/mL                                                                                                       | Day 7           |
| Figure S4a       | 2-step |                                                  | HDBMEC expressing BFP (10 x10 <sup>6</sup> /mL)                  | HDBMEC expressing BFP (5 x10 <sup>6</sup> /mL)                  | Dermal FBs (1.5 x10 <sup>6</sup> /mL)                                             | Bovine Fibrin 3 mg/mL                                                                                                       | Day 7           |
| Figure S4b       | 2-step |                                                  | iPSC-ECs (10 x10 <sup>6</sup> /mL)                               | iPSC-ECs (5 x10 <sup>6</sup> /mL)                               | Lung FBs (1.5 x10 <sup>6</sup> /mL)                                               | Bovine Fibrin 3 mg/mL                                                                                                       | Day 7           |
| Figure S4c left  | 2-step |                                                  | Brain microvascular ECs expressing GFP (12 x10 <sup>6</sup> /mL) | Brain microvascular ECs expressing GFP (6 x10 <sup>6</sup> /mL) | Brain pericytes (1 x10 <sup>6</sup> /mL)<br>Astrocytes (0.5 x10 <sup>6</sup> /mL) | Bovine Fibrin 3 mg/mL                                                                                                       | Day 7           |
| Figure S4c right | 2-step |                                                  | ImHUVECs expressing BFP (10 x10 <sup>6</sup> /mL)                | Brain microvascular ECs expressing GFP (6 x10 <sup>6</sup> /mL) | Brain pericytes (1 x10 <sup>6</sup> /mL)<br>Astrocytes (0.5 x10 <sup>6</sup> /mL) | Bovine Fibrin 3 mg/mL                                                                                                       | Day 7           |
